# Supplementary material
Source: ML conference proceedings conference paper supplement (https://openreview.net/forum?id=Ih2yL7o2Gq)
Supplement: supplementary_material [file attachment]

## A EM Procedure for Multiple Means

We show that the Bayesian EM procedure provides sensible estimates of the regularization parameter even in the setting of the normal multiple means problem with known variance  $\sigma^2$ . In this setting, the LOOCV is unable to provide any guidance on how to choose  $\lambda$  due to all the information for each regression parameter being concentrated in a single observation. We use the  $\tau$  parameterisation of the hyperparameter, rather than  $\tau^2$ , as the resulting estimator has an easy to analyse form.

In the normal multiple means model, we are given  $(y_i|\beta_i) \sim N(\beta_i, 1)$ , i.e.,  $\mathbf{y}$  is a  $p$ -dimensional normally distributed vector with mean  $\beta$  and identity covariance matrix. The conditional posterior distribution of  $\beta$  is:

$$\beta|\mathbf{y}, \tau \sim N((1-\kappa)\mathbf{y}, \sigma^2(1-\kappa)) \quad (17)$$

where  $\kappa = 1/(1+\tau^2)$ . Under this setting, Strawderman [43] proved that if  $p \geq 3$ , then any estimator of the form

$$\left(1 - r\left(\frac{1}{2}\|\mathbf{y}\|^2\right)\right) \frac{p-2}{\|\mathbf{y}\|^2} \mathbf{y} \quad (18)$$

where  $0 \leq r\left(\frac{1}{2}\|\mathbf{y}\|^2\right) \leq 2$  and  $r(\cdot)$  is non-decreasing, is minimax, i.e., it dominates least-squares. We will now show that our EM procedure not only yields reasonable estimates in this setting, in contrast to LOOCV, but that these estimates are minimax, and hence dominate least-squares.

For the normal means model, we can obtain a closed form solution for the optimum  $\tau$ , by solving for the stationary point for which  $\tau_{t+1} = \tau_t$ , with  $\tau \sim C^+(0, 1)$ :

$$\arg \min_{\tau} \{E_{\beta}[-\log p(\mathbf{y}|\beta, \tau) - \log p(\beta|\tau) - \log \pi(\tau)]\} = \tau$$

$$\arg \min_{\tau} \left\{ \frac{p}{2} \log \tau^2 + \frac{w}{2\tau^2} + \log(1 + \tau^2) \right\} = \tau$$

$$\sqrt{\frac{w - p + \sqrt{p^2 + 8w + 2pw + w^2}}{2(2+p)}} = \tau,$$

and with  $w = \sum_{j=1}^p E[\beta_j^2] = (1-\kappa)^2 s + (1-\kappa)p$ ,  $s = \|\mathbf{y}\|^2$  and  $\tau = \sqrt{\frac{1-\kappa}{\kappa}}$ . This yields

$$\sqrt{\frac{(\sqrt{p((\kappa-2)^2 p - 8\kappa + 8)} - 2(\kappa-1)^2 s((\kappa-2)p - 4) + (\kappa-1)^4 s^2 - \kappa p + (\kappa-1)^2 s)}{2(2+p)}} = \sqrt{\frac{1-\kappa}{\kappa}}$$

with solution  $\kappa = (p+2)/s$ . Plugging this  $\kappa$  solution into (17), we note that the resulting estimator of  $\beta$  (17) is of the form (18) with

$$\begin{aligned} r\left(\frac{1}{2}\|\mathbf{y}\|^2\right) &= \left(\frac{p+2}{\|\mathbf{y}\|^2}\right) / \left(\frac{p-2}{\|\mathbf{y}\|^2}\right) \\ &= \frac{p+2}{p-2} \end{aligned}$$

As we have  $r\left(\frac{1}{2}\|\mathbf{y}\|^2\right) \leq 2$  when  $p \geq 6$ , the EM ridge estimator is minimax in this setting for  $p \geq 6$ .

## B Proof of Theorem 3.1

We prove that for sufficiently large  $n$ , a continuous injective reparameterization of the negative log joint posterior of (5) & (7) is convex when restricted to  $\tau^2 \geq \epsilon$ . This is sufficient, since unimodality is preserved by strictly monotone transformations and continuous injective reparameterizations.

Specifically, for the presented hierarchical model, the negative log joint posterior up to an additive constant is

$$\frac{n+p+2}{2} \log \sigma^2 + \frac{1}{2\sigma^2} \|\mathbf{y} - \mathbf{X}\beta\|^2 + \frac{p+2-2a}{2} \log \tau^2 + \frac{\|\beta\|^2}{2\sigma^2\tau^2} + (a+b) \log(1 + \tau^2)$$

and reparameterising with  $\phi = \beta/\sigma$ ,  $\rho = 1/\sigma$  and  $\chi = 1/\tau$  and reorganising terms yields

$$-(n+p+2) \log \rho - (p+2-2a) \log \chi + (a+b) \log(1 + \chi^{-2}) + \frac{1}{2} \|\rho\mathbf{y} - \mathbf{X}\phi\|^2 + \frac{\|\chi\phi\|^2}{2}.$$

The first three terms can easily be checked to be convex via a second derivative test, for which the convexity of the second term is contingent on the condition that  $a < 1 + p/2$ , a condition that holds true in our specific scenario with  $a = b = 1/2$ . For the last two terms, the combined Hessian is of block form  $[\mathbf{A}, \mathbf{B}; \mathbf{B}^T, \mathbf{C}]$  with  $\mathbf{A} = \mathbf{X}^T \mathbf{X} + \chi^2 \mathbf{I}_p$ ,  $\mathbf{B} = 2\chi\phi$ , and  $\mathbf{C} = \|\phi\|^2$ . Symmetric matrices of this form are positive definite if  $\mathbf{A}$  and its Schur complement

$$\mathbf{C} - \mathbf{B}^T \mathbf{A}^{-1} \mathbf{B} = \|\phi\|^2 - 4\phi^T (\mathbf{X}^T \mathbf{X} / \chi^2 + \mathbf{I}_p)^{-1} \phi$$

are positive definite. Clearly,  $\mathbf{A}$  is positive definite. Moreover, for  $n > 4/(\epsilon^2 \gamma_n)$ , we have

$$\begin{aligned} \phi^T (\mathbf{X}^T \mathbf{X} / \chi^2 + \mathbf{I})^{-1} \phi &= \phi^T (\mathbf{V} \mathbf{\Sigma}^T \mathbf{\Sigma} \mathbf{V}^T / \chi^2 + \mathbf{I})^{-1} \phi \\ &= \phi^T \mathbf{V} (\mathbf{\Sigma}^T \mathbf{\Sigma} / \chi^2 + \mathbf{I})^{-1} \mathbf{V}^T \phi \\ &\leq \phi^T \mathbf{V} \mathbf{V}^T \phi \chi^2 / (n \gamma_n) \\ &= ((\mathbf{I} - \mathbf{V} \mathbf{V}^T) \phi + \mathbf{V} \mathbf{V}^T \phi)^T \mathbf{V} \mathbf{V}^T \phi \chi^2 / (n \gamma_n) \\ &= \|\mathbf{V} \mathbf{V}^T \phi\|^2 \chi^2 / (n \gamma_n) \\ &\leq \|\phi\|^2 \chi^2 / (n \gamma_n) \\ &< \|\phi\|^2 / (\epsilon^2 n \gamma_n) \\ &< \|\phi\|^2 / 4 \end{aligned}$$

where we used the fact that  $\mathbf{V} \mathbf{V}^T$  is the orthogonal projection onto the column space of  $\mathbf{V}$ . The overall inequality implies the required positivity of the Schur complement.

## C Derivation of Equation 9

### C.1 Derivation of ESN

Here we show that

$$\begin{aligned} \sum_{j=1}^p \mathbb{E} [\beta_j^2 \mid \hat{\tau}^{(t)}, \hat{\sigma}^{2(t)}] &= \text{tr}(\text{Cov}[\beta]) + \sum_{j=1}^p \mathbb{E} [\beta_j]^2 \\ &= \sigma^2 \text{tr}(\mathbf{A}_\tau^{-1}) + \|\hat{\beta}_\tau\|^2 \end{aligned}$$

This is a rather straightforward proof. We use the fact that given a random variable  $x$ ; the expected squared value of  $x$  is  $\mathbb{E}[x^2] = \text{Var}[x] + \mathbb{E}[x]^2$ .

### C.2 Derivation of ESS

Here we show that

$$\mathbb{E}_\beta [\|\mathbf{y} - \mathbf{X}\beta\|^2 \mid \hat{\tau}^{(t)}, \hat{\sigma}^{2(t)}] = \|\mathbf{y} - \mathbf{X} \mathbb{E}[\beta]\|^2 + \text{tr}(\mathbf{X}^T \mathbf{X} \text{Cov}[\beta]) \quad (19)$$

We first provide an important fact on the quadratic forms of random variables in Lemma C.1 below:

**Lemma C.1.** *Let  $\mathbf{b}$  be a  $p$ -dimensional random vector and  $\mathbf{A}$  be a  $p$ -dimensional symmetric matrix. If  $\mathbb{E}[\mathbf{b}] = \boldsymbol{\mu}$  and  $\text{Var}(\mathbf{b}) = \boldsymbol{\Sigma}$ , then  $\mathbb{E}[\mathbf{b}^T \mathbf{A} \mathbf{b}] = \text{tr}(\mathbf{A} \boldsymbol{\Sigma}) + \boldsymbol{\mu}^T \mathbf{A} \boldsymbol{\mu}$ .*

Now, we expand the left-hand side of Equation 19 :

$$\begin{aligned} \mathbb{E}_\beta [\|\mathbf{y} - \mathbf{X}\beta\|^2] &= \mathbb{E}_\beta [(\mathbf{y} - \mathbf{X}\beta)^T (\mathbf{y} - \mathbf{X}\beta)] \\ &= \mathbb{E}_\beta [\mathbf{y}^T \mathbf{y} - 2\mathbf{y}^T \mathbf{X}\beta + \beta^T \mathbf{X}^T \mathbf{X} \beta] \\ &= \mathbf{y}^T \mathbf{y} - 2\mathbf{y}^T \mathbf{X} \mathbb{E}[\beta] + \mathbb{E}[\beta^T \mathbf{X}^T \mathbf{X} \beta] \end{aligned} \quad (20)$$

The use of lemma C.1 allows Equation 20 to be rewritten as

$$\begin{aligned} \mathbb{E}_\beta [\|\mathbf{y} - \mathbf{X}\beta\|^2] &= \mathbf{y}^T \mathbf{y} - 2\mathbf{y}^T \mathbf{X} \mathbb{E}[\beta] + \mathbb{E}[\beta]^T (\mathbf{X}^T \mathbf{X}) \mathbb{E}[\beta] + \text{tr}(\mathbf{X}^T \mathbf{X} \text{Cov}[\beta]) \\ &= \|\mathbf{y} - \mathbf{X} \mathbb{E}[\beta]\|^2 + \text{tr}(\mathbf{X}^T \mathbf{X} \text{Cov}[\beta]) \\ &= \|\mathbf{y} - \mathbf{X} \hat{\beta}_\tau\|^2 + \sigma^2 \text{tr}(\mathbf{X}^T \mathbf{X} \mathbf{A}_\tau^{-1}) \end{aligned}$$

## D Solving for the parameter updates (Derivation of Equation 11)

Rather than solving a two-dimensional numerical optimization problem (10), we show that given a fixed  $\tau^2$ , we can find a closed formed solution for  $\sigma^2$ , and vice versa. To start off, we need to find the solution for  $\sigma^2$  as a function of  $\tau^2$ . First, find the negative logarithm of the joint probability distribution of hierarchy (5):

$$\arg \min_{\sigma^2} \{E_{\beta}[-\log p(y|X, \beta, \sigma^2) - \log p(\beta|\tau^2, \sigma^2) - \log p(\sigma^2) - \log \pi(\tau^2)]\}. \quad (21)$$

Dropping terms that do not depend on  $\sigma^2$  yields:

$$\begin{aligned} & \arg \min_{\sigma^2} \{E_{\beta}[-\log p(y|X, \beta, \sigma^2) - \log p(\beta|\tau^2, \sigma^2) - \log p(\sigma^2)]\} \\ &= \arg \min_{\sigma^2} \left\{ \left( \frac{n+p}{2} \right) \log \sigma^2 + \frac{\text{ESS}}{2\sigma^2} + \frac{\text{ESN}}{2\sigma^2\tau^2} + \log \sigma^2 \right\} \\ &= \arg \min_{\sigma^2} \left\{ \left( \frac{n+p+2}{2} \right) \log \sigma^2 + \frac{\text{ESS}}{2\sigma^2} + \frac{\text{ESN}}{2\sigma^2\tau^2} \right\}. \end{aligned} \quad (22)$$

Solving the above minimization problem involves differentiating the negative logarithm with respect to  $\sigma^2$  and solving for  $\sigma^2$  that set the derivative to zero. This gives us:

$$\begin{aligned} \frac{\partial}{\partial \sigma^2} \left\{ \left( \frac{n+p+2}{2} \right) \log \sigma^2 + \frac{\text{ESS}}{2\sigma^2} + \frac{\text{ESN}}{2\sigma^2\tau^2} \right\} &= 0 \\ \frac{2+n+p}{2\sigma^2} - \frac{\text{ESS}}{2(\sigma^2)^2} - \frac{\text{ESN}}{2(\sigma^2)^2\tau^2} &= 0 \\ \hat{\sigma}^2 &= \frac{\tau^2 \text{ESS} + \text{ESN}}{(n+p+2)\tau^2} \end{aligned} \quad (23)$$

Next, to obtain the M-step updates for the shrinkage parameter  $\tau^2$ , we repeat the same procedure - find the negative logarithm of the joint probability distribution and remove terms that do not depend on either  $\sigma^2$  or  $\tau^2$ :

$$\begin{aligned} & \arg \min_{\tau^2} \{E_{\beta}[-\log p(y|X, \beta, \sigma^2) - \log p(\beta|\tau^2, \sigma^2) - \log p(\sigma^2) - \log \pi(\tau^2)]\} \\ &= \arg \min_{\tau^2} \left\{ \left( \frac{n+p+2}{2} \right) \log \sigma^2 + \frac{\text{ESS}}{2\sigma^2} + \frac{\text{ESN}}{2\sigma^2\tau^2} + \frac{p}{2} \log \tau^2 + \log(1+\tau^2) + \frac{\log \tau^2}{2} \right\} \end{aligned} \quad (24)$$

Substituting the solution for  $\sigma^2$  (23) into equation (24), yields a Q-function that depends only on  $\tau^2$ . We eliminate the dependency on  $\sigma^2$  by finding the optimal  $\sigma^2$  as a function of  $\tau^2$  and substitute it into the Q-function of (24):

$$\arg \min_{\tau^2} \left\{ \frac{1}{2} \left[ (1+p) \log \tau^2 + 2 \log(1+\tau^2) + (n+p+2) \left( 1 + \log \left( \frac{\text{ESN} + \tau^2 \text{ESS}}{(n+p+2)\tau^2} \right) \right) \right] \right\} \quad (25)$$

Differentiating (25) with respect to  $\tau^2$  and solving for the  $\tau^2$  that set the derivative to zero yields:

$$\begin{aligned} \frac{\partial}{\partial \tau^2} \left\{ \frac{1}{2} \left[ (1+p) \log \tau^2 + 2 \log(1+\tau^2) + (n+p+2) \left( 1 + \log \left( \frac{\text{ESN} + \tau^2 \text{ESS}}{(n+p+2)\tau^2} \right) \right) \right] \right\} &= 0 \\ \frac{(3\text{ESS} + \text{ESS}p)(\tau^2)^2 + (\text{ESN} - \text{ESN}n + \text{ESS} + \text{ESS}p)\tau^2 - \text{ESN} - \text{ESN}n}{2\tau^2(1+\tau^2)(\text{ESN} + \tau^2 \text{ESS})} &= 0. \end{aligned} \quad (26)$$

The  $\tau^2$  update is the positive solution to the quadratic equation (in terms of  $\tau^2$ ) (26):

$$\hat{\tau}^2 = \frac{(n-1)\text{ESN} - (1+p)\text{ESS} + \sqrt{(4n+4)\text{ESN}(3+p)\text{ESS} + ((1-n)\text{ESN} + (p+1)\text{ESS})^2}}{(6+2p)\text{ESS}}$$

Table 3: Pseudo-code of EM algorithm with complexity of individual steps.

| EM Algorithm with SVD                                                                                                                                                                                               | Operations |
|---------------------------------------------------------------------------------------------------------------------------------------------------------------------------------------------------------------------|------------|
| <b>Input:</b> Standardised predictors $\mathbf{X} \in \mathbb{R}^{n \times p}$ , centered targets $\mathbf{y} \in \mathbb{R}^n$ and convergence threshold $\epsilon > 0$<br><b>Output:</b> $\beta \in \mathbb{R}^p$ |            |
| $r = \min(n, p)$                                                                                                                                                                                                    | $O(1)$     |
| IF $p \geq n$                                                                                                                                                                                                       |            |
| $[\mathbf{U}, \Sigma, \mathbf{V}] = \text{svd}(\mathbf{X})$                                                                                                                                                         | $O(mr^2)$  |
| $\mathbf{s}^2 = (\Sigma_{1,1}^2, \dots, \Sigma_{r,r}^2)$                                                                                                                                                            | $O(r)$     |
| $\mathbf{c} = (\mathbf{U}^T \mathbf{y}) \odot \mathbf{s}$                                                                                                                                                           | $O(nr)$    |
| ELSE                                                                                                                                                                                                                |            |
| $[\mathbf{V}, \Sigma^2] = \text{eigen}(\mathbf{X}^T \mathbf{X})$                                                                                                                                                    | $O(mr^2)$  |
| $\mathbf{s}^2 = (\Sigma_{1,1}^2, \dots, \Sigma_{r,r}^2)$                                                                                                                                                            | $O(r)$     |
| $\mathbf{c} = \mathbf{V}^T \mathbf{X}^T \mathbf{y}$                                                                                                                                                                 | $O(np)$    |
| $Y = \mathbf{y}^T \mathbf{y}$                                                                                                                                                                                       | $O(n)$     |
| $\tau^2 \leftarrow 1$                                                                                                                                                                                               | $O(1)$     |
| $\sigma^2 \leftarrow (1/n) \sum_{i=1}^n (y_i - \bar{y})^2, \bar{y} = (1/n) \sum_{i=1}^n y_i$                                                                                                                        | $O(n)$     |
| $\text{RSS} \leftarrow \infty$                                                                                                                                                                                      | $O(1)$     |
| DO                                                                                                                                                                                                                  |            |
| $\text{RSS}_{\text{old}} \leftarrow \text{RSS}$                                                                                                                                                                     | $O(k)$     |
| $\alpha_j \leftarrow \frac{c_j}{s_j^2 + 1/\tau^2}$                                                                                                                                                                  | $O(kr)$    |
| (E-step)                                                                                                                                                                                                            |            |
| $\text{ESN} \leftarrow \sum_{j=1}^r \alpha_j^2 + \sigma^2 \left( \sum_{j=1}^r \frac{1}{s_j^2 + \tau^{-2}} + \tau^2 \max(p - n, 0) \right)$                                                                          | $O(kr)$    |
| $\text{RSS} \leftarrow Y - 2 \sum_{j=1}^r \alpha_j c_j + \sum_{j=1}^r \alpha_j^2 s_j^2$                                                                                                                             | $O(kr)$    |
| $\text{ESS} \leftarrow \text{RSS} + \sigma^2 \left( \sum_{j=1}^r \frac{s_j^2}{s_j^2 + \tau^{-2}} \right)$                                                                                                           | $O(kr)$    |
| (M-step)                                                                                                                                                                                                            |            |
| $g \leftarrow (4n + 4)\text{ESN} (3 + p)\text{ESS} + ((1 - n)\text{ESN} + (p + 1)\text{ESS})^2$                                                                                                                     | $O(k)$     |
| $\tau^2 \leftarrow \frac{(n - 1)\text{ESN} - (1 + p)\text{ESS} + \sqrt{g}}{(6 + 2p)\text{ESS}}$                                                                                                                     | $O(k)$     |
| $\sigma^2 \leftarrow \frac{\tau^2 \text{ESS} + \text{ESN}}{(n + p + 2)\tau^2}$                                                                                                                                      | $O(k)$     |
| $\delta \leftarrow \frac{ \text{RSS}_{\text{old}} - \text{RSS} }{(1 +  \text{RSS} )}$                                                                                                                               | $O(k)$     |
| until $\delta < \epsilon$                                                                                                                                                                                           |            |
| $\alpha_j \leftarrow \frac{c_j}{s_j^2 + 1/\tau^2}$                                                                                                                                                                  | $O(kr)$    |
| $\beta = \mathbf{V} \alpha$                                                                                                                                                                                         | $O(pr)$    |
| return $\beta$                                                                                                                                                                                                      |            |

Table 4: Pseudocode of the fast LOOCV algorithm with complexity of individual steps.  $\mathbf{R}$  has column vectors  $\mathbf{r}_j$  for  $1 \leq j \leq r$ .

| Fast LOOCV ridge with SVD                                                                                                                                                                                                                                  | Operation  |
|------------------------------------------------------------------------------------------------------------------------------------------------------------------------------------------------------------------------------------------------------------|------------|
| <b>Input:</b> Standardised predictors $\mathbf{X} \in \mathbb{R}^{n \times p}$ , centered targets $\mathbf{y} \in \mathbb{R}^n$ and a grid of penalty parameters $L = (\lambda_1, \lambda_2, \dots, \lambda_l)$<br><b>Output:</b> $\beta \in \mathbb{R}^p$ |            |
| $r = \min(n, p)$                                                                                                                                                                                                                                           | $O(1)$     |
| IF $p \geq n$                                                                                                                                                                                                                                              |            |
| $[\mathbf{U}, \Sigma, \mathbf{V}] = \text{svd}(\mathbf{X})$                                                                                                                                                                                                | $O(mr^2)$  |
| $\mathbf{s} = (\Sigma_{1,1}, \dots, \Sigma_{r,r})$                                                                                                                                                                                                         | $O(r)$     |
| $\mathbf{R} = (s_1 \mathbf{u}_1, \dots, s_r \mathbf{u}_r)$                                                                                                                                                                                                 | $O(nr)$    |
| $\mathbf{c} = (\mathbf{U}^T \mathbf{y}) \odot \mathbf{s}$                                                                                                                                                                                                  | $O(nr)$    |
| ELSE                                                                                                                                                                                                                                                       |            |
| $[\mathbf{V}, \Sigma^2] = \text{eigen}(\mathbf{X}^T \mathbf{X})$                                                                                                                                                                                           | $O(mr^2)$  |
| $\mathbf{s}^2 = (\Sigma_{1,1}^2, \dots, \Sigma_{r,r}^2)$                                                                                                                                                                                                   | $O(r)$     |
| $\mathbf{R} = \mathbf{X} \mathbf{V}$                                                                                                                                                                                                                       | $O(nrp)$   |
| $\mathbf{c} = \mathbf{R}^T \mathbf{y}$                                                                                                                                                                                                                     | $O(nr)$    |
| $\mathbf{U} = (\mathbf{r}_1/s_1, \dots, \mathbf{r}_r/s_r)$                                                                                                                                                                                                 | $O(nr)$    |
| for $\lambda \in L$ {                                                                                                                                                                                                                                      |            |
| $h_i = \sum_{j=1}^r \left( \frac{s_j^2}{s_j^2 + \lambda} \right) u_{ij}^2, \quad (i = 1, \dots, n)$                                                                                                                                                        | $O(\ln r)$ |
| $\alpha_j = \frac{c_j}{s_j^2 + \lambda}$                                                                                                                                                                                                                   | $O(lr)$    |
| $\mathbf{e} = \mathbf{y} - \mathbf{R} \boldsymbol{\alpha}$                                                                                                                                                                                                 | $O(\ln r)$ |
| $\text{CVE}(\lambda) = \frac{1}{n} \sum_{i=1}^n \left( \frac{e_i}{1 - h_i} \right)^2$                                                                                                                                                                      | $O(\ln)$   |
| }                                                                                                                                                                                                                                                          |            |
| Find $\lambda^* = \arg \min_{\lambda \in L} \{\text{CVE}(\lambda)\}$                                                                                                                                                                                       | $O(l)$     |
| $\alpha_j = \frac{c_j}{s_j^2 + \lambda^*}$                                                                                                                                                                                                                 | $O(r)$     |
| $\beta = \mathbf{V} \boldsymbol{\alpha}$                                                                                                                                                                                                                   | $O(pr)$    |
| <b>return</b> $\beta$                                                                                                                                                                                                                                      |            |

## E Supplementary Results Material

### E.1 Real Datasets Details

Table 5: Real datasets details

| DATASETS                                               | ABBREVIATION | $n$    | $p$  | TARGET VARIABLE                                                     | SOURCE |
|--------------------------------------------------------|--------------|--------|------|---------------------------------------------------------------------|--------|
| BUZZ IN SOCIAL MEDIA (TWITTER)                         | TWITTER      | 583250 | 77   | mean number of active discussion                                    | UCI    |
| BLOG FEEDBACK                                          | BLOG         | 60021  | 281  | number of comments in the next 24 hours                             | UCI    |
| RELATIVE LOCATION OF CT SLICES ON AXIAL AXIS           | CT SLICES    | 53500  | 386  | reference: Relative image location on axial axis                    | UCI    |
| BUZZ IN SOCIAL MEDIA (TOM'S HARDWARE)                  | TOMSHW       | 28179  | 97   | Mean Number of display                                              | UCI    |
| CONDITION-BASED MAINTENANCE OF NAVAL PROPULSION PLANTS | NPD - COM    | 11934  | 16   | GT Compressor decay state coefficient                               | UCI    |
| CONDITION-BASED MAINTENANCE OF NAVAL PROPULSION PLANTS | NPD - TUR    | 11934  | 16   | GT Turbine decay state coefficient                                  | UCI    |
| PARKINSON'S TELEMONTITORING                            | PT - MOTOR   | 5875   | 26   | motor UPDRS score                                                   | UCI    |
| PARKINSON'S TELEMONTITORING                            | PT - TOTAL   | 5875   | 26   | total UPDRS score                                                   | UCI    |
| ABALONE                                                | ABALONE      | 4177   | 8    | Rings (age in years)                                                | UCI    |
| COMMUNITIES AND CRIME                                  | CRIME        | 1994   | 128  | ViolentCrimesPerPop                                                 | UCI    |
| AIRFOIL SELF-NOISE                                     | AIRFOIL      | 1503   | 6    | Scaled sound pressure level (decibels)                              | UCI    |
| STUDENT PERFORMANCE                                    | STUDENT      | 649    | 33   | final grade (with G1 & G2 removed)                                  | UCI    |
| CONCRETE COMPRESSIVE STRENGTH                          | CONCRETE     | 1030   | 9    | Concrete compressive strength (MPa)                                 | UCI    |
| FOREST FIRES                                           | F.FIRES      | 517    | 13   | forest burned area (in ha)                                          | UCI    |
| BOSTON HOUSING                                         | B.HOUSING    | 506    | 13   | Median value of owner-occupied homes in \$1000's                    | [21]   |
| FACEBOOK METRICS                                       | FACEBOOK     | 500    | 19   | Total Interactions (with comment, like, and share columns removed)  | UCI    |
| DIABETES                                               | DIABETES     | 442    | 10   | quantitative measure of disease progression one year after baseline | [13]   |
| REAL ESTATE VALUATION                                  | R.ESTATE     | 414    | 7    | house price of unit area                                            | UCI    |
| AUTO MPG                                               | A.MPG        | 398    | 8    | city-cycle fuel consumption in miles per gallon                     | UCI    |
| YACHT HYDRODYNAMICS                                    | YACHT        | 308    | 7    | residuary resistance per unit weight of displacement                | UCI    |
| AUTOMOBILE                                             | A.MOBILE     | 205    | 26   | price                                                               | UCI    |
| RAT EYE TISSUES                                        | EYE          | 120    | 200  | the expression level of TRIM32 gene                                 | [39]   |
| RIBOFLAVIN                                             | RIBO         | 71     | 4088 | Log-transformed riboflavin production rate                          | [9]    |
| CROP                                                   | CROP         | 24000  | 3072 | 24 crop classes                                                     | UCR    |
| ELECTRIC DEVICES                                       | ELECD        | 16637  | 4096 | 7 electric devices                                                  | UCR    |
| STARLIGHT CURVES                                       | STARL        | 9236   | 7168 | 3 starlight curves                                                  | UCR    |

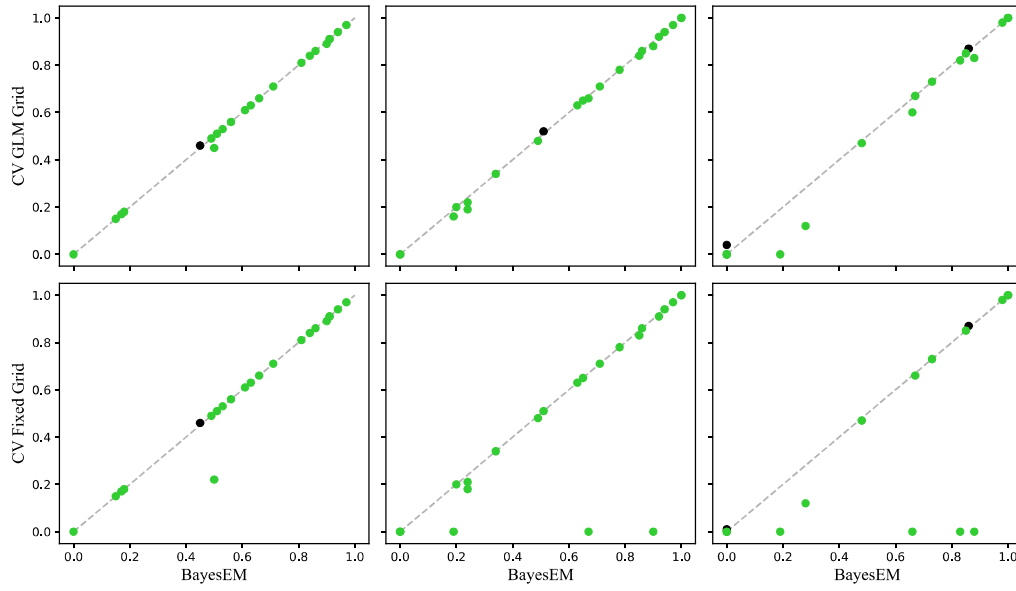

Figure 3: Comparison of predictive performance ( $R^2$ ) of EM algorithm ( $x$ -axes) against CV with fixed grid ( $y$ -axes, top) and `glmnet` heuristic ( $y$ -axis, bottom). Columns correspond to the results of linear features (left), second-order features (middle), and third-order features (right). Negative values are capped at 0. Points skewing toward the bottom right indicate when our EM approach is giving better/same prediction performance as LOOCV (colored in green).
